### Erratum

**Sane, S. P. and Dickinson, M. H.** (2001). The control of flight force by a flapping wing: lift and drag production. *J. Exp. Biol.* **204**, 2607–2626.

The correct form shown in the online versions of equation (1) is :

$$F_{a,N} = \rho \frac{\pi}{4} R^2 \bar{c}^2 (\ddot{\phi} \sin \alpha + \dot{\phi} \dot{\alpha} \cos \alpha) \int_0^1 \hat{r} \hat{c}^2(\hat{r}) d\hat{r} - \ddot{\alpha} \rho \frac{\pi}{16} \bar{c}^3 R \int_0^1 \hat{c}^2(\hat{r}) d\hat{r}, \quad (1)$$

and not

$$F_{a,N} = \rho \frac{\pi}{4} R^2 \bar{c}^2 (\ddot{\phi} \sin \alpha + \ddot{\phi} \dot{\alpha} \cos \alpha) \int_0^1 \hat{r} \hat{c}^2(\hat{r}) d\hat{r} - \ddot{\alpha} \rho \frac{\pi}{16} \bar{c}^3 R \int_0^1 \hat{c}^2(\hat{r}) d\hat{r}, \quad (1)$$

as appears in the printed version. The only difference is that in the second term of the correct equation, there is only one (not two) dots above  $\phi$ , signifying a single and not a double derivative of stroke position with respect to time.
